# Supplementary material for: Shape-memory balloon offering simultaneous thermo/chemotherapies to improve anti-osteosarcoma efficacy
Source: Royal Society of Chemistry journal article supplement (doi:10.1039/d1bm00780g), 2021-01-01
Supplement: d1bm00780g1.pdf [file d1bm00780g1.pdf]

## Electronic Supplementary Information (ESI)

### **Shape-Memory Balloon Offering Simultaneous Thermo/Chemotherapies to Improve Anti-Osteosarcoma Efficacy**

*Sosuke Ouchi,<sup>a,b</sup> Eri Niiyama,<sup>a,c</sup> Ken Sugo,<sup>a,c</sup> Koichiro Uto,<sup>a</sup> Satoshi Takenaka,<sup>d</sup> Akihiko Kikuchi,<sup>b</sup> and Mitsuhiro Ebara<sup>\*,a,b,c</sup>*

<sup>a</sup> Research Center for Functional Materials, National Institute for Materials Science (NIMS), Ibaraki 305-0044, Japan

<sup>b</sup> Department of Materials Science and Technology, Tokyo University of Science, Tokyo 125-8585, Japan

<sup>c</sup> Graduate School of Pure and Applied Sciences, University of Tsukuba, Ibaraki 305-8577, Japan

<sup>d</sup> Department of Orthopaedic Surgery, Osaka International Cancer Institute, Osaka 541-8567, Japan

\* Correspondence. E-mail: [EBARA.Mitsuhiro@nims.go.jp](mailto:EBARA.Mitsuhiro@nims.go.jp) (M. Ebara)

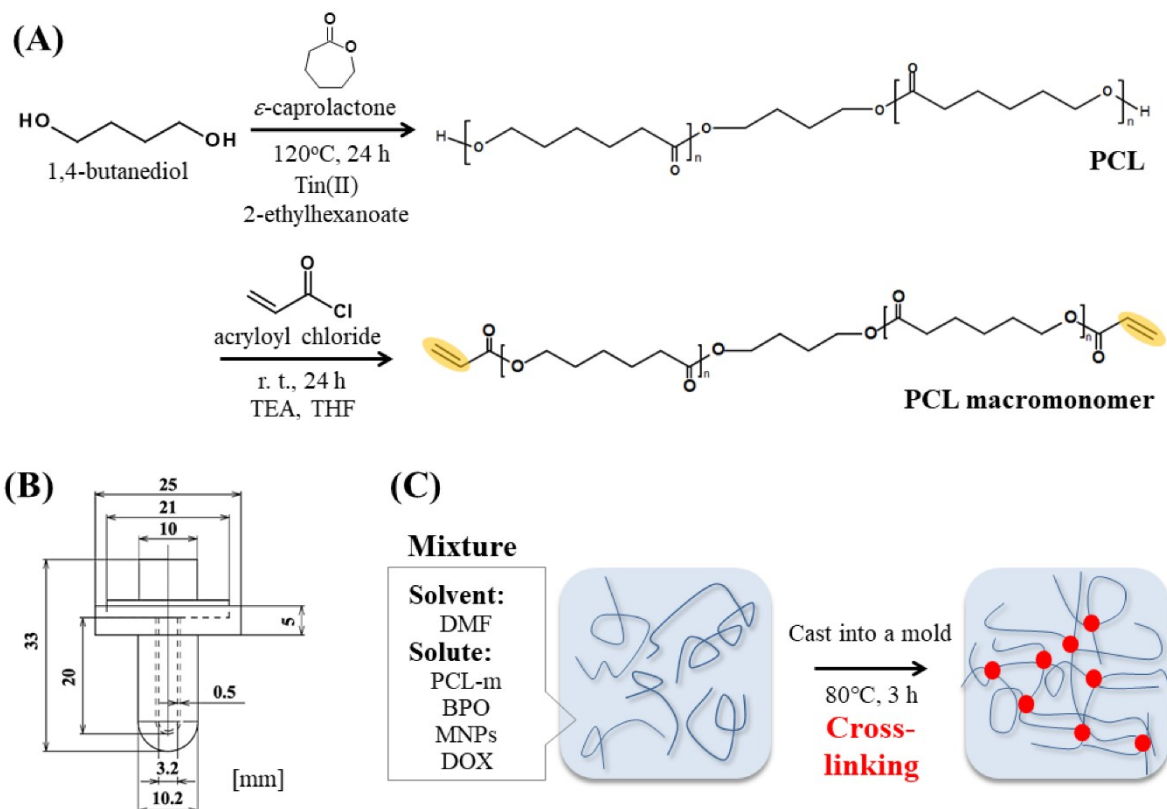

**Fig. S1** Synthetic reaction and polymerization of shape-memory PCL balloon. (A) Synthetic reactions of PCL and PCL macromonomer; (B) illustration of PTFE-based mold, exhibiting a post-molding thickness of 0.5 mm; (C) schematic illustration of shape-memory PCL polymerization. The red mark on the right shows the crosslinking point.

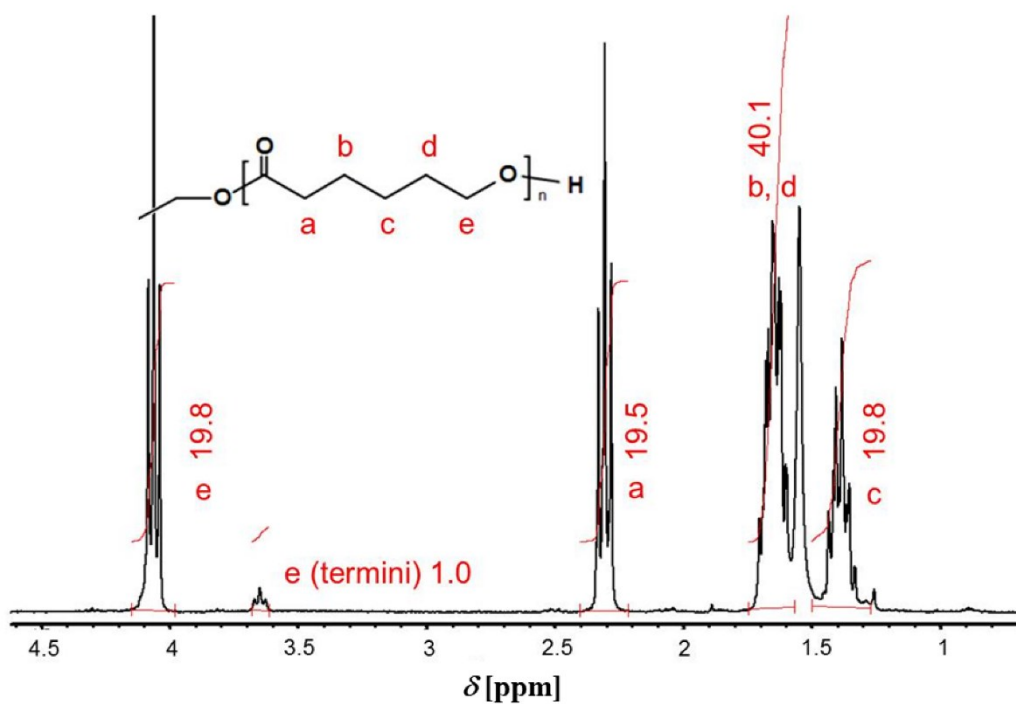

**Fig. S2**  $^1\text{H}$  NMR spectrum of the synthesized PCL in a deuterated solvent ( $\text{CDCl}_3$ ).

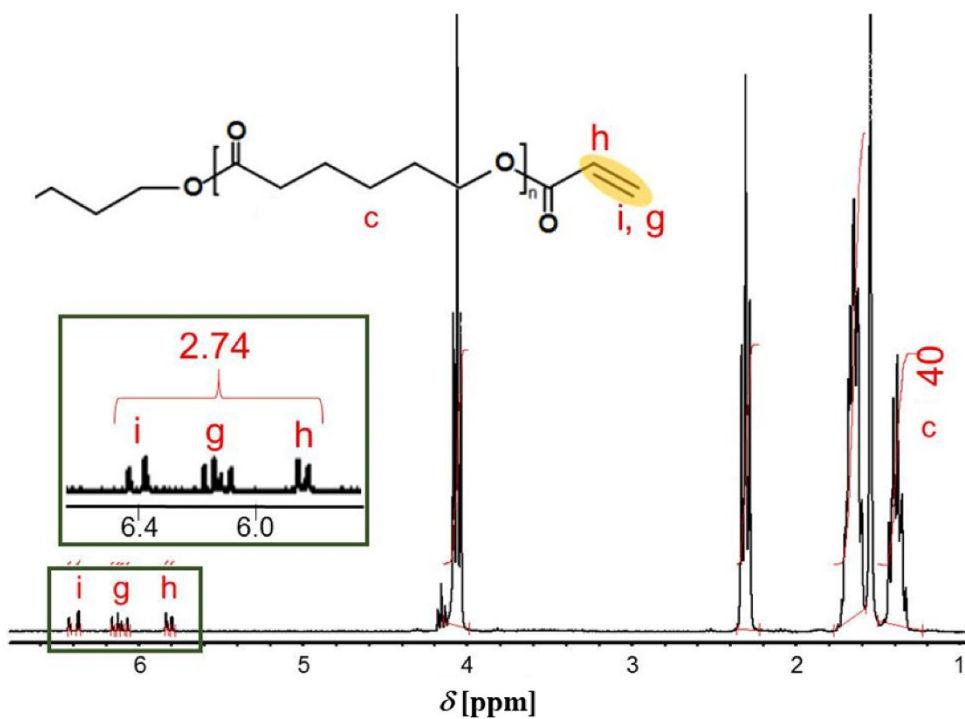

**Fig. S3**  $^1\text{H}$  NMR spectrum of the synthesized PCL macromonomer in a deuterated solvent ( $\text{CDCl}_3$ ).

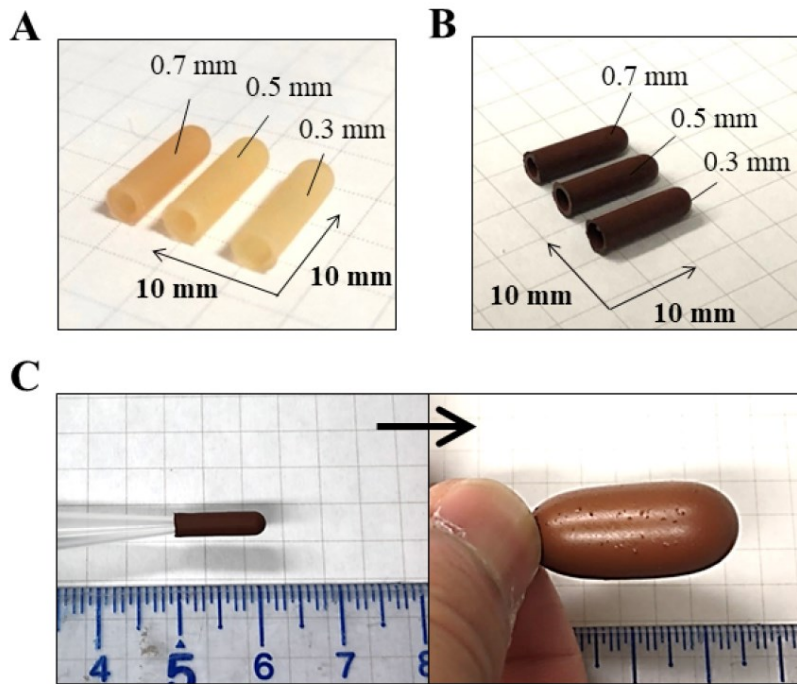

□ □

**Fig. S4** Three types of SMB with different thicknesses: 0.3, 0.5, and 0.7 mm (A) without and (B) with MNP loading. (C) Shape-memory property of fabricated SMB with a thickness of 0.3 mm and containing 31.6 wt% MNP. Blow molding above the shape-transition temperature expanded the SMB and memorized its shape by cooling below 37 °C.

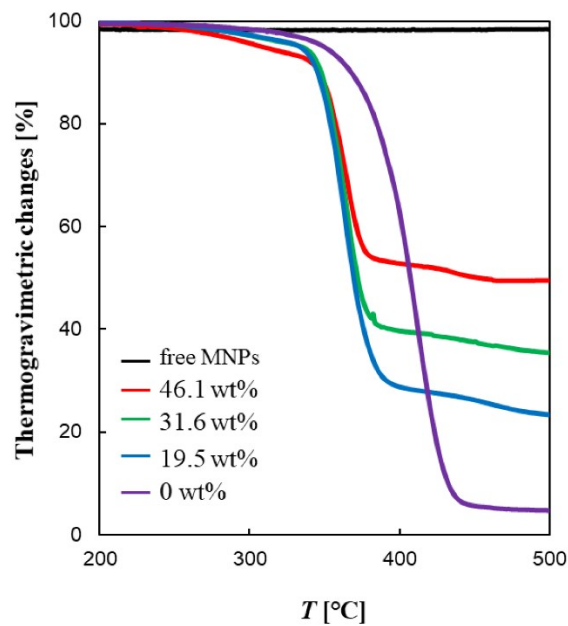

**Fig. S5** Thermogravimetric changes of the PCL film containing different MNP contents identified by TG-DTA analysis.

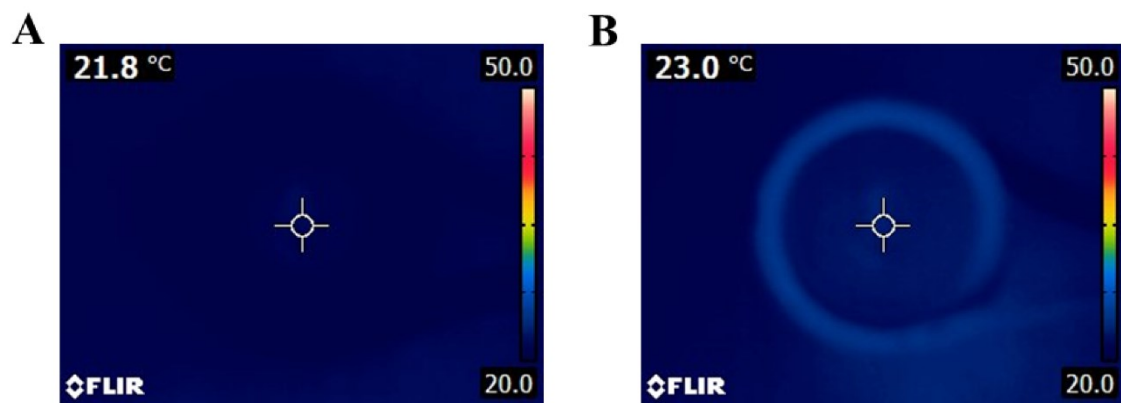

**Fig. S6** Infrared thermal images of the PCL film without MNP loading in a copper coil at (A) 0 and (B) 360 s after AMF irradiation.
